# Supplementary material for: Rural-Nonrural Differences in Telemedicine Use for Mental and Substance Use Disorders Among Medicaid Beneficiaries
Source: Atypon-hosted journal article supplement (doi:10.1176/appi.ps.201900444), 2020-04-15
Supplement: PS201900444_ds1.pdf [file PS201900444_ds1.pdf]

**Figure 1.** Rural and nonrural trends in telemedicine visits for mental and substance use disorder among Medicaid beneficiaries, 2012–17

**Prevalence of receiving any telemedicine visits (per person-year)**

a. Telemedicine visits for **mental disorder**  
(n = 2,654,339)

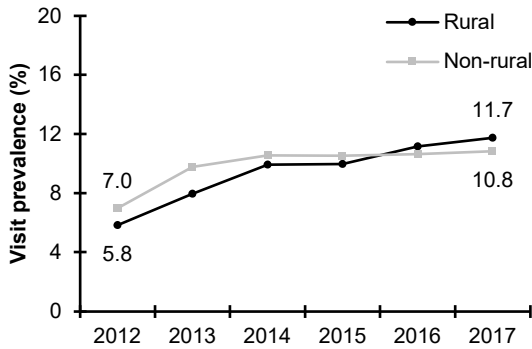

b. Telemedicine visits for **substance use disorder**  
(n = 663,068)

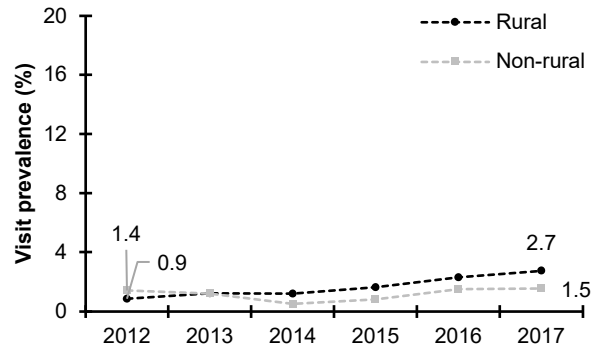

**Amount of telemedicine visits (mean number per person-year among those receiving any)**

c. Telemedicine visits for **mental disorder**  
(n = 262,430)

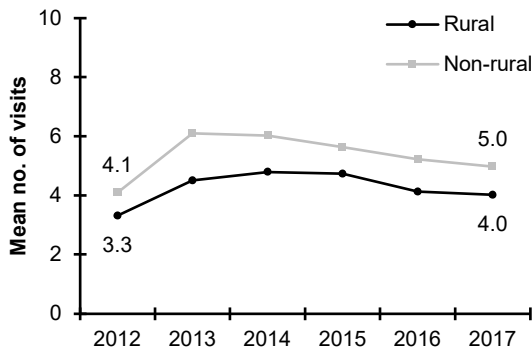

d. Telemedicine visits for **substance use disorder**  
(n = 8,943)

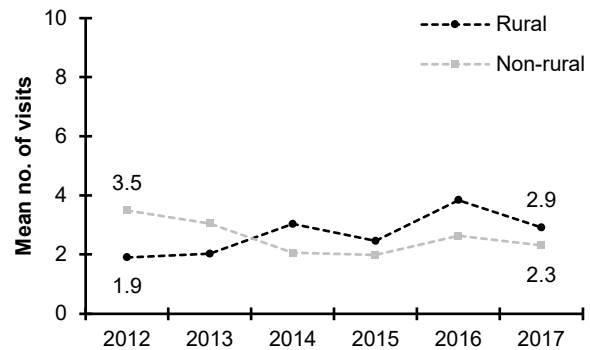

**Notes.** Authors' analysis of claims data for 2012-17 from the IBM Watson Health MarketScan Multistate Medicaid Database. Telemedicine visits for mental disorder visits had a primary diagnosis of mental disorder. Telemedicine visits for substance use disorder visits had a primary diagnosis of substance use disorder. For point estimates and tests of within- and between-group changes over time, see the online appendix.
