# Supplementary material for: Rural-Nonrural Differences in Telemedicine Use for Mental and Substance Use Disorders Among Medicaid Beneficiaries
Source: Atypon-hosted journal article supplement (doi:10.1176/appi.ps.201900444), 2020-04-15
Supplement: PS201900444_ds2.pdf [file PS201900444_ds2.pdf]

**Table S1. ICD-9 and ICD-10 diagnosis codes used to identify M/SUDs**

|                                                 | <b>ICD-9 Codes</b>                                                                     | <b>ICD-10 Codes</b>                                                                                                  |
|-------------------------------------------------|----------------------------------------------------------------------------------------|----------------------------------------------------------------------------------------------------------------------|
|                                                 | (2012 to Q3 2015)                                                                      | (Q4 2015 to 2017)                                                                                                    |
| <b>Mental disorders</b>                         |                                                                                        |                                                                                                                      |
| Attention-deficit/hyperactivity disorder (ADHD) | 314.xx                                                                                 | F90.xxx                                                                                                              |
| Anxiety                                         | 300.xx (except 300.4x)                                                                 | F40.xxx – F42.xxx, F44.xxx, F45.xxx                                                                                  |
| Bipolar disorder                                | 296.0x, 296.1x, 296.4x, 296.5x, 296.6x, 296.7x, 296.8x, 300.4x                         | F30.xxx, F31.xxx                                                                                                     |
| Depression                                      | 296.2x, 296.3x, 311.xx                                                                 | F32.xxx, F33.xxx, F34.1xx                                                                                            |
| Post-traumatic stress disorder (PTSD)           | 309.81                                                                                 | F43.1xx                                                                                                              |
| Schizophrenia and other psychotic disorders     | 295.xx, 297.xx, 298.xx                                                                 | F20.xxx – F29.xxx                                                                                                    |
| Other mental disorders                          | 296.9x, 299.xx, 301.xx, 302.xx, 307.xx, 308.xx, 309.xx (except 309.81), 312.xx, 313.xx | F34.xxx (except F34.1xx), F39.xxx, F43.xxx, F48.xxx, F50.xxx – F69.xxx, F80xxx – F89.xxx, F91.xxx – F98.xxx, F99.xxx |
| <b>Substance use disorders (SUD)</b>            |                                                                                        |                                                                                                                      |
| Alcohol use disorder (AUD)                      | 303.xx, 305.0x                                                                         | F10.xxx                                                                                                              |
| Opioid use disorder (OUD)                       | 304.0x, 305.5x                                                                         | F11.xxx                                                                                                              |
| Other SUDs                                      | 304.1x – 304.9x, 305.1x – 305.4x, 305.6x – 305.9x                                      | F12.xxx – F19.xxx                                                                                                    |



|                              |           |      |      |        |           |      |      |        |
|------------------------------|-----------|------|------|--------|-----------|------|------|--------|
| 1                            | Reference |      |      |        | Reference |      |      |        |
| 2                            | 1.47      | 1.45 | 1.49 | <0.001 | 0.13      | 0.12 | 0.15 | <0.001 |
| 3                            | 1.81      | 1.78 | 1.84 | <0.001 | 0.19      | 0.18 | 0.21 | <0.001 |
| 4                            | 2.12      | 2.08 | 2.16 | <0.001 | 0.27      | 0.25 | 0.29 | <0.001 |
| 5                            | 2.38      | 2.33 | 2.43 | <0.001 | 0.31      | 0.29 | 0.33 | <0.001 |
| 6                            | 2.77      | 2.69 | 2.84 | <0.001 | 0.32      | 0.29 | 0.35 | <0.001 |
| <b>Study year</b>            |           |      |      |        |           |      |      |        |
| 2012                         | Reference |      |      |        | Reference |      |      |        |
| 2013                         | 1.09      | 1.07 | 1.10 | <0.001 | 0.22      | 0.20 | 0.24 | <0.001 |
| 2014                         | 1.08      | 1.06 | 1.10 | <0.001 | 0.20      | 0.19 | 0.22 | <0.001 |
| 2015                         | 0.99      | 0.97 | 1.00 | 0.112  | 0.12      | 0.10 | 0.14 | <0.001 |
| 2016                         | 1.06      | 1.04 | 1.08 | <0.001 | 0.08      | 0.06 | 0.10 | <0.001 |
| 2017                         | 0.99      | 0.97 | 1.01 | 0.449  | 0.04      | 0.02 | 0.06 | <0.001 |
| <b>Constant</b>              | 0.12      | 0.11 | 0.12 | <0.001 | 1.41      | 1.37 | 1.44 | <0.001 |
| <b>N (beneficiary-years)</b> | 2,654,339 |      |      |        | 262,430   |      |      |        |

**Notes.** Authors' analysis of claims data for 2012–17 from the IBM MarketScan Multi-State Medicaid Database. MH telemedicine visits had a primary diagnosis of mental disorder. Model 1 is a logistic regression model. Model 2 is a generalized linear model with gamma distribution and log link. Both models include clustered standard errors to account for multiple beneficiary-years per unique beneficiary. State fixed effects not shown to protect data contributor confidentiality.

**Table S3. Regression models used to produce results for Exhibit 3 panel 1B**

|                                               | <b>Model 3.<br/>No. of outpatient MH visits if any received</b> |                                |       |                |
|-----------------------------------------------|-----------------------------------------------------------------|--------------------------------|-------|----------------|
|                                               | <b>Coef.</b>                                                    | <b>95% Confidence Interval</b> |       | <b>P value</b> |
| <b>Received any MH telemedicine</b>           |                                                                 |                                |       |                |
| No                                            | Reference                                                       |                                |       |                |
| Yes                                           | 0.73                                                            | 0.73                           | 0.74  | <0.001         |
| <b>Rurality</b>                               |                                                                 |                                |       |                |
| Nonrural                                      | Reference                                                       |                                |       |                |
| Rural                                         | -0.07                                                           | -0.08                          | -0.07 | <0.001         |
| <b>MH Telemedicine * rurality interaction</b> |                                                                 |                                |       |                |
| Received MH telemedicine & rural              | 0.07                                                            | 0.06                           | 0.09  | <0.001         |
| <b>Age group (years)</b>                      |                                                                 |                                |       |                |
| 35–49                                         | Reference                                                       |                                |       |                |
| 18–24                                         | 0.02                                                            | 0.02                           | 0.03  | <0.001         |
| 25–34                                         | -0.05                                                           | -0.06                          | -0.05 | <0.001         |
| 50–64                                         | 0.04                                                            | 0.04                           | 0.05  | <0.001         |
| <b>Sex</b>                                    |                                                                 |                                |       |                |
| Female                                        | Reference                                                       |                                |       |                |
| Male                                          | 0.16                                                            | 0.16                           | 0.17  | <0.001         |
| <b>Race/ethnicity</b>                         |                                                                 |                                |       |                |
| White                                         | Reference                                                       |                                |       |                |
| Black                                         | 0.15                                                            | 0.15                           | 0.16  | <0.001         |
| Hispanic                                      | 0.01                                                            | 0.00                           | 0.03  | 0.118          |
| Other                                         | 0.09                                                            | 0.07                           | 0.10  | <0.001         |
| <b>Health plan type</b>                       |                                                                 |                                |       |                |
| Managed care                                  | Reference                                                       |                                |       |                |
| Fee for service                               | 0.42                                                            | 0.42                           | 0.43  | <0.001         |
| <b>Mental disorder diagnoses</b>              |                                                                 |                                |       |                |
| Depression                                    | Reference                                                       |                                |       |                |
| ADHD                                          | -0.41                                                           | -0.43                          | -0.40 | <0.001         |
| Anxiety                                       | -0.46                                                           | -0.46                          | -0.45 | <0.001         |
| Bipolar                                       | 0.22                                                            | 0.21                           | 0.23  | <0.001         |
| PTSD                                          | 0.29                                                            | 0.28                           | 0.31  | <0.001         |

|                                         |           |       |       |        |
|-----------------------------------------|-----------|-------|-------|--------|
| Schizophrenia                           | 0.61      | 0.60  | 0.62  | <0.001 |
| Other                                   | 0.74      | 0.74  | 0.75  | <0.001 |
| Multiple                                | 0.70      | 0.69  | 0.70  | <0.001 |
| <b>Substance use disorder diagnoses</b> |           |       |       |        |
| AUD                                     | Reference |       |       |        |
| None                                    | 0.01      | 0.00  | 0.02  | 0.162  |
| ODD                                     | -0.11     | -0.12 | -0.09 | <0.001 |
| Other                                   | 0.01      | 0.00  | 0.02  | 0.105  |
| Multiple                                | 0.05      | 0.03  | 0.06  | <0.001 |
| <b>Beneficiary-year</b>                 |           |       |       |        |
| 1                                       | Reference |       |       |        |
| 2                                       | 0.33      | 0.32  | 0.33  | <0.001 |
| 3                                       | 0.45      | 0.45  | 0.46  | <0.001 |
| 4                                       | 0.59      | 0.58  | 0.59  | <0.001 |
| 5                                       | 0.51      | 0.50  | 0.51  | <0.001 |
| 6                                       | 0.59      | 0.58  | 0.60  | <0.001 |
| <b>Study year</b>                       |           |       |       |        |
| 2012                                    | Reference |       |       |        |
| 2013                                    | -0.28     | -0.29 | -0.27 | <0.001 |
| 2014                                    | -0.32     | -0.33 | -0.31 | <0.001 |
| 2015                                    | -0.43     | -0.44 | -0.42 | <0.001 |
| 2016                                    | -0.36     | -0.37 | -0.36 | <0.001 |
| 2017                                    | -0.40     | -0.41 | -0.40 | <0.001 |
| <b>Constant</b>                         | 1.76      | 1.75  | 1.77  | <0.001 |
| <b>N (beneficiary-years)</b>            | 2,654,339 |       |       |        |

**Notes.** Authors' analysis of claims data for 2012–17 from the IBM MarketScan Multi-State Medicaid Database. Outpatient MH visits had a primary diagnosis of mental disorder. Model 3 is a generalized linear model with gamma distribution and log link. It includes clustered standard errors to account for multiple beneficiary-years per unique beneficiary. State fixed effects not shown to protect data contributor confidentiality.

**Table S4. Regression models used to produce results for Exhibit 3 panel 2A**

|                                         | Model 4.<br>Receipt of any SUD telemedicine treatment |                         |      |         | Model 5.<br>No. of SUD telemedicine visits if any received |                         |       |         |
|-----------------------------------------|-------------------------------------------------------|-------------------------|------|---------|------------------------------------------------------------|-------------------------|-------|---------|
|                                         | Odds Ratio                                            | 95% Confidence Interval |      | P value | Coef.                                                      | 95% Confidence Interval |       | P value |
| <b>Rurality</b>                         |                                                       |                         |      |         |                                                            |                         |       |         |
| Nonrural                                | Reference                                             |                         |      |         | Reference                                                  |                         |       |         |
| Rural                                   | 1.49                                                  | 1.42                    | 1.57 | <0.001  | 0.20                                                       | 0.14                    | 0.26  | <0.001  |
| <b>Age group (years)</b>                |                                                       |                         |      |         |                                                            |                         |       |         |
| 35–49                                   | Reference                                             |                         |      |         | Reference                                                  |                         |       |         |
| 18–24                                   | 0.99                                                  | 0.92                    | 1.08 | 0.899   | 0.00                                                       | -0.09                   | 0.08  | 0.932   |
| 25–34                                   | 1.01                                                  | 0.95                    | 1.07 | 0.75    | 0.02                                                       | -0.05                   | 0.08  | 0.58    |
| 50–64                                   | 1.00                                                  | 0.93                    | 1.08 | 0.997   | 0.09                                                       | 0.02                    | 0.17  | 0.017   |
| <b>Sex</b>                              |                                                       |                         |      |         |                                                            |                         |       |         |
| Female                                  | Reference                                             |                         |      |         | Reference                                                  |                         |       |         |
| Male                                    | 0.96                                                  | 0.91                    | 1.01 | 0.102   | -0.08                                                      | -0.13                   | -0.02 | 0.008   |
| <b>Race/ethnicity</b>                   |                                                       |                         |      |         |                                                            |                         |       |         |
| White                                   | Reference                                             |                         |      |         | Reference                                                  |                         |       |         |
| Black                                   | 1.00                                                  | 0.94                    | 1.06 | 0.954   | -0.12                                                      | -0.19                   | -0.06 | <0.001  |
| Hispanic                                | 0.86                                                  | 0.67                    | 1.09 | 0.199   | -0.16                                                      | -0.38                   | 0.06  | 0.159   |
| Other                                   | 0.87                                                  | 0.72                    | 1.04 | 0.127   | 0.35                                                       | 0.13                    | 0.56  | 0.002   |
| <b>Health plan type</b>                 |                                                       |                         |      |         |                                                            |                         |       |         |
| Managed care                            | Reference                                             |                         |      |         | Reference                                                  |                         |       |         |
| Fee for service                         | 0.90                                                  | 0.83                    | 0.98 | 0.011   | 0.08                                                       | 0.02                    | 0.14  | 0.012   |
| <b>Mental disorder diagnoses</b>        |                                                       |                         |      |         |                                                            |                         |       |         |
| Depression                              | Reference                                             |                         |      |         | Reference                                                  |                         |       |         |
| None                                    | 0.47                                                  | 0.43                    | 0.50 | <0.001  | 0.03                                                       | -0.05                   | 0.12  | 0.458   |
| ADHD                                    | 0.64                                                  | 0.48                    | 0.85 | 0.002   | 0.26                                                       | -0.03                   | 0.54  | 0.075   |
| Anxiety                                 | 0.58                                                  | 0.52                    | 0.65 | <0.001  | -0.08                                                      | -0.20                   | 0.04  | 0.197   |
| Bipolar                                 | 1.35                                                  | 1.22                    | 1.50 | <0.001  | 0.07                                                       | -0.04                   | 0.18  | 0.214   |
| PTSD                                    | 1.07                                                  | 0.88                    | 1.29 | 0.515   | -0.02                                                      | -0.23                   | 0.20  | 0.862   |
| Schizophrenia                           | 1.94                                                  | 1.72                    | 2.19 | <0.001  | 0.00                                                       | -0.12                   | 0.12  | 0.995   |
| Other                                   | 0.63                                                  | 0.50                    | 0.79 | <0.001  | -0.09                                                      | -0.32                   | 0.15  | 0.457   |
| Multiple                                | 1.45                                                  | 1.35                    | 1.56 | <0.001  | -0.10                                                      | -0.18                   | -0.01 | 0.023   |
| <b>Substance use disorder diagnoses</b> |                                                       |                         |      |         |                                                            |                         |       |         |
| AUD                                     | Reference                                             |                         |      |         | Reference                                                  |                         |       |         |
| ODD                                     | 0.82                                                  | 0.76                    | 0.88 | <0.001  | 0.33                                                       | 0.24                    | 0.42  | <0.001  |
| Other                                   | 1.20                                                  | 1.12                    | 1.29 | <0.001  | 0.11                                                       | 0.04                    | 0.18  | 0.004   |
| Multiple                                | 1.74                                                  | 1.62                    | 1.87 | <0.001  | 0.12                                                       | 0.05                    | 0.20  | 0.001   |

| <b>Beneficiary-year</b>      |           |      |      |        |           |       |       |        |
|------------------------------|-----------|------|------|--------|-----------|-------|-------|--------|
| 1                            | Reference |      |      |        | Reference |       |       |        |
| 2                            | 1.18      | 1.12 | 1.25 | <0.001 | 0.16      | 0.10  | 0.22  | <0.001 |
| 3                            | 1.17      | 1.09 | 1.25 | <0.001 | 0.14      | 0.06  | 0.21  | <0.001 |
| 4                            | 1.10      | 1.01 | 1.21 | 0.027  | 0.23      | 0.13  | 0.33  | <0.001 |
| 5                            | 1.13      | 1.02 | 1.25 | 0.021  | 0.12      | 0.01  | 0.24  | 0.038  |
| 6                            | 1.08      | 0.94 | 1.24 | 0.294  | 0.30      | 0.13  | 0.48  | 0.001  |
| <b>Study year</b>            |           |      |      |        |           |       |       |        |
| 2012                         | Reference |      |      |        | Reference |       |       |        |
| 2013                         | 0.93      | 0.85 | 1.01 | 0.069  | -0.17     | -0.27 | -0.08 | <0.001 |
| 2014                         | 0.56      | 0.51 | 0.62 | <0.001 | -0.12     | -0.24 | -0.01 | 0.033  |
| 2015                         | 0.86      | 0.78 | 0.94 | 0.001  | -0.40     | -0.50 | -0.30 | <0.001 |
| 2016                         | 1.58      | 1.45 | 1.71 | <0.001 | -0.29     | -0.39 | -0.20 | <0.001 |
| 2017                         | 1.69      | 1.55 | 1.83 | <0.001 | -0.48     | -0.58 | -0.39 | <0.001 |
| <b>Constant</b>              | 0.01      | 0.01 | 0.01 | <0.001 | 1.19      | 1.07  | 1.31  | <0.001 |
| <b>N (beneficiary-years)</b> | 663,068   |      |      |        | 8,943     |       |       |        |

**Notes.** Authors' analysis of claims data for 2012–17 from the IBM MarketScan Multi-State Medicaid Database. SUD telemedicine visits had a primary diagnosis of SUD. Model 4 is a logistic regression model. Model 5 is a generalized linear model with gamma distribution and log link. Both models include clustered standard errors to account for multiple beneficiary-years per unique beneficiary. State fixed effects not shown to protect data contributor confidentiality.

**Table S5.** Regression models used to produce results for Table 2 panel 2B

|                                                | <b>Model 6.<br/>No. of outpatient MH visits if any received</b> |                                |       |                |
|------------------------------------------------|-----------------------------------------------------------------|--------------------------------|-------|----------------|
|                                                | <b>Coef.</b>                                                    | <b>95% Confidence Interval</b> |       | <b>P value</b> |
| <b>Received any SUD telemedicine</b>           |                                                                 |                                |       |                |
| No                                             | Reference                                                       |                                |       |                |
| Yes                                            | 0.45                                                            | 0.41                           | 0.49  | <0.001         |
| <b>Rurality</b>                                |                                                                 |                                |       |                |
| Nonrural                                       | Reference                                                       |                                |       |                |
| Rural                                          | -0.03                                                           | -0.04                          | -0.02 | <0.001         |
| <b>SUD Telemedicine * rurality interaction</b> |                                                                 |                                |       |                |
| Received SUD telemedicine & rural              | 0.04                                                            | -0.02                          | 0.10  | 0.163          |
| <b>Age group (years)</b>                       |                                                                 |                                |       |                |
| 35–49                                          | Reference                                                       |                                |       |                |
| 18–24                                          | 0.01                                                            | 0.00                           | 0.02  | 0.214          |
| 25–34                                          | 0.09                                                            | 0.09                           | 0.10  | <0.001         |
| 50–64                                          | -0.12                                                           | -0.13                          | -0.11 | <0.001         |
| <b>Sex</b>                                     |                                                                 |                                |       |                |
| Female                                         | Reference                                                       |                                |       |                |
| Male                                           | -0.04                                                           | -0.05                          | -0.03 | <0.001         |
| <b>Race/ethnicity</b>                          |                                                                 |                                |       |                |
| White                                          | Reference                                                       |                                |       |                |
| Black                                          | 0.06                                                            | 0.05                           | 0.08  | <0.001         |
| Hispanic                                       | 0.04                                                            | 0.00                           | 0.07  | 0.037          |
| Other                                          | 0.02                                                            | -0.01                          | 0.05  | 0.178          |
| <b>Health plan type</b>                        |                                                                 |                                |       |                |
| Managed care                                   | Reference                                                       |                                |       |                |
| Fee for service                                | -0.06                                                           | -0.07                          | -0.04 | <0.001         |
| <b>Mental disorder diagnoses</b>               |                                                                 |                                |       |                |
| Depression                                     | Reference                                                       |                                |       |                |
| None                                           | -0.12                                                           | -0.14                          | -0.11 | <0.001         |
| ADHD                                           | -0.19                                                           | -0.23                          | -0.15 | <0.001         |
| Anxiety                                        | -0.16                                                           | -0.18                          | -0.14 | <0.001         |
| Bipolar                                        | 0.02                                                            | 0.00                           | 0.04  | 0.056          |
| PTSD                                           | 0.09                                                            | 0.06                           | 0.12  | <0.001         |
| Schizophrenia                                  | -0.12                                                           | -0.15                          | -0.09 | <0.001         |
| Other                                          | -0.13                                                           | -0.16                          | -0.09 | <0.001         |



|                                         |           |       |       |        |
|-----------------------------------------|-----------|-------|-------|--------|
| Multiple                                | -0.07     | -0.08 | -0.05 | <0.001 |
| <b>Substance use disorder diagnoses</b> |           |       |       |        |
| AUD                                     | Reference |       |       |        |
| ODD                                     | 0.87      | 0.86  | 0.88  | <0.001 |
| Other                                   | 0.07      | 0.06  | 0.09  | <0.001 |
| Multiple                                | 1.11      | 1.10  | 1.13  | <0.001 |
| <b>Beneficiary-year</b>                 |           |       |       |        |
| 1                                       | Reference |       |       |        |
| 2                                       | 0.15      | 0.14  | 0.16  | <0.001 |
| 3                                       | 0.15      | 0.14  | 0.16  | <0.001 |
| 4                                       | 0.17      | 0.15  | 0.18  | <0.001 |
| 5                                       | 0.10      | 0.08  | 0.12  | <0.001 |
| 6                                       | 0.14      | 0.11  | 0.17  | <0.001 |
| <b>Study year</b>                       |           |       |       |        |
| 2012                                    | Reference |       |       |        |
| 2013                                    | -0.12     | -0.13 | -0.10 | <0.001 |
| 2014                                    | -0.10     | -0.12 | -0.09 | <0.001 |
| 2015                                    | -0.12     | -0.13 | -0.10 | <0.001 |
| 2016                                    | 0.10      | 0.08  | 0.11  | <0.001 |
| 2017                                    | 0.10      | 0.09  | 0.12  | <0.001 |
| <b>Constant</b>                         | 2.07      | 2.05  | 2.09  | <0.001 |
| <b>N (beneficiary-years)</b>            | 663,068   |       |       |        |

**Notes.** Authors' analysis of claims data for 2012–17 from the IBM MarketScan Multi-State Medicaid Database. Outpatient SUD visits had a primary diagnosis of SUD. Model 6 is a generalized linear model with gamma distribution and log link. It includes clustered standard errors to account for multiple beneficiary-years per unique beneficiary. State fixed effects not shown to protect data contributor confidentiality.

**Table S6.** Regression models used to produce results for Exhibit 4 panels 1A and 2A

|                                                                                | <b>Model 7.</b><br>Received any telemedicine for mental disorders |                         |       |         | <b>Model 8.</b><br>No. of telemedicine visits for mental disorders if any received |                         |       |         |
|--------------------------------------------------------------------------------|-------------------------------------------------------------------|-------------------------|-------|---------|------------------------------------------------------------------------------------|-------------------------|-------|---------|
|                                                                                | Odds Ratio                                                        | 95% Confidence Interval |       | P value | Coef.                                                                              | 95% Confidence Interval |       | P value |
| <b>Rurality (ref. = nonrural)</b>                                              |                                                                   |                         |       |         |                                                                                    |                         |       |         |
| Rural                                                                          | 0.23                                                              | 0.20                    | 0.26  | <0.001  | 0.10                                                                               | 0.07                    | 0.14  | <0.001  |
| <b>Mental disorder diagnoses (ref. = depression)</b>                           |                                                                   |                         |       |         |                                                                                    |                         |       |         |
| ADHD                                                                           | -1.07                                                             | -1.14                   | -1.01 | <0.001  | -0.05                                                                              | -0.13                   | 0.03  | 0.21    |
| Anxiety                                                                        | -1.15                                                             | -1.18                   | -1.12 | <0.001  | -0.13                                                                              | -0.17                   | -0.09 | <0.001  |
| Bipolar                                                                        | 0.66                                                              | 0.63                    | 0.68  | <0.001  | 0.10                                                                               | 0.08                    | 0.13  | <0.001  |
| PTSD                                                                           | 0.37                                                              | 0.33                    | 0.41  | <0.001  | 0.03                                                                               | -0.03                   | 0.08  | 0.333   |
| Schizophrenia                                                                  | 0.97                                                              | 0.94                    | 0.99  | <0.001  | 0.20                                                                               | 0.17                    | 0.23  | <0.001  |
| Other                                                                          | -1.70                                                             | -1.75                   | -1.64 | <0.001  | -0.07                                                                              | -0.15                   | 0.00  | 0.041   |
| Multiple                                                                       | 0.74                                                              | 0.73                    | 0.76  | <0.001  | 0.17                                                                               | 0.15                    | 0.19  | <0.001  |
| <b>Race/ethnicity (ref. = white)</b>                                           |                                                                   |                         |       |         |                                                                                    |                         |       |         |
| Black                                                                          | 0.49                                                              | 0.48                    | 0.51  | <0.001  | 0.15                                                                               | 0.13                    | 0.16  | <0.001  |
| Hispanic                                                                       | 0.22                                                              | 0.17                    | 0.27  | <0.001  | -0.18                                                                              | -0.23                   | -0.13 | <0.001  |
| Other                                                                          | 0.17                                                              | 0.12                    | 0.22  | <0.001  | 0.02                                                                               | -0.03                   | 0.07  | 0.479   |
| <b>MH Diagnosis * rurality interaction (ref. = depression &amp; nonrural)</b>  |                                                                   |                         |       |         |                                                                                    |                         |       |         |
| ADHD & rural                                                                   | 0.31                                                              | 0.19                    | 0.43  | <0.001  | 0.11                                                                               | -0.06                   | 0.28  | 0.218   |
| Anxiety & rural                                                                | 0.33                                                              | 0.27                    | 0.38  | <0.001  | 0.07                                                                               | 0.01                    | 0.14  | 0.028   |
| Bipolar & rural                                                                | -0.03                                                             | -0.08                   | 0.02  | 0.291   | -0.09                                                                              | -0.13                   | -0.04 | 0.001   |
| PTSD & rural                                                                   | 0.32                                                              | 0.24                    | 0.40  | <0.001  | 0.02                                                                               | -0.07                   | 0.10  | 0.667   |
| Schizophrenia & rural                                                          | 0.04                                                              | -0.02                   | 0.10  | 0.157   | -0.12                                                                              | -0.18                   | -0.07 | <0.001  |
| Other & rural                                                                  | 0.32                                                              | 0.21                    | 0.43  | <0.001  | 0.07                                                                               | -0.08                   | 0.21  | 0.356   |
| Multiple & rural                                                               | 0.05                                                              | 0.02                    | 0.09  | 0.002   | -0.08                                                                              | -0.11                   | -0.04 | <0.001  |
| <b>Race/ethnicity &amp; rurality interaction (ref. = white &amp; nonrural)</b> |                                                                   |                         |       |         |                                                                                    |                         |       |         |
| Black & rural                                                                  | -0.12                                                             | -0.16                   | -0.08 | <0.001  | -0.16                                                                              | -0.19                   | -0.12 | <0.001  |
| Hispanic & rural                                                               | -0.16                                                             | -0.29                   | -0.02 | 0.021   | 0.15                                                                               | 0.03                    | 0.28  | 0.018   |
| Other & rural                                                                  | -0.03                                                             | -0.13                   | 0.07  | 0.546   | -0.03                                                                              | -0.14                   | 0.07  | 0.506   |
| <b>Age group (years; ref. = 35-49)</b>                                         |                                                                   |                         |       |         |                                                                                    |                         |       |         |
| 18-24                                                                          | -0.06                                                             | -0.07                   | -0.04 | <0.001  | -0.03                                                                              | -0.05                   | -0.01 | 0.001   |
| 25-34                                                                          | -0.21                                                             | -0.22                   | -0.19 | <0.001  | -0.10                                                                              | -0.11                   | -0.08 | <0.001  |
| 50-64                                                                          | 0.11                                                              | 0.09                    | 0.12  | <0.001  | 0.08                                                                               | 0.06                    | 0.10  | <0.001  |
| <b>Sex (ref. = female)</b>                                                     |                                                                   |                         |       |         |                                                                                    |                         |       |         |
| Male                                                                           | 0.16                                                              | 0.14                    | 0.17  | <0.001  | -0.03                                                                              | -0.04                   | -0.01 | <0.001  |
| <b>Health plan type (ref. = managed care)</b>                                  |                                                                   |                         |       |         |                                                                                    |                         |       |         |
| Fee for service                                                                | -0.17                                                             | -0.19                   | -0.15 | <0.001  | -0.02                                                                              | -0.04                   | 0.00  | 0.036   |
| <b>SUD diagnoses (ref. = AUD)</b>                                              |                                                                   |                         |       |         |                                                                                    |                         |       |         |
| None                                                                           | -0.25                                                             | -0.28                   | -0.23 | <0.001  | -0.08                                                                              | -0.11                   | -0.05 | <0.001  |
| ODD                                                                            | -0.29                                                             | -0.32                   | -0.25 | <0.001  | -0.15                                                                              | -0.19                   | -0.11 | <0.001  |

|                                    |           |       |       |        |         |       |      |        |
|------------------------------------|-----------|-------|-------|--------|---------|-------|------|--------|
| Other                              | 0.18      | 0.15  | 0.21  | <0.001 | 0.01    | -0.02 | 0.05 | 0.477  |
| Multiple                           | 0.06      | 0.03  | 0.10  | <0.001 | 0.01    | -0.03 | 0.04 | 0.668  |
| <b>Beneficiary-year (ref. = 1)</b> |           |       |       |        |         |       |      |        |
| 2                                  | 0.38      | 0.37  | 0.40  | <0.001 | 0.14    | 0.12  | 0.15 | <0.001 |
| 3                                  | 0.59      | 0.58  | 0.61  | <0.001 | 0.19    | 0.18  | 0.21 | <0.001 |
| 4                                  | 0.75      | 0.73  | 0.77  | <0.001 | 0.27    | 0.25  | 0.29 | <0.001 |
| 5                                  | 0.87      | 0.84  | 0.89  | <0.001 | 0.31    | 0.29  | 0.33 | <0.001 |
| 6                                  | 1.02      | 0.99  | 1.04  | <0.001 | 0.32    | 0.29  | 0.35 | <0.001 |
| <b>Study year (ref. = 2012)</b>    |           |       |       |        |         |       |      |        |
| 2013                               | 0.08      | 0.07  | 0.10  | <0.001 | 0.22    | 0.20  | 0.24 | <0.001 |
| 2014                               | 0.08      | 0.06  | 0.09  | <0.001 | 0.20    | 0.18  | 0.22 | <0.001 |
| 2015                               | -0.01     | -0.03 | 0.00  | 0.123  | 0.12    | 0.10  | 0.14 | <0.001 |
| 2016                               | 0.06      | 0.04  | 0.08  | <0.001 | 0.08    | 0.06  | 0.10 | <0.001 |
| 2017                               | -0.01     | -0.03 | 0.01  | 0.495  | 0.04    | 0.02  | 0.06 | 0.001  |
| <b>Constant</b>                    | -2.14     | -2.18 | -2.11 | <0.001 | 1.38    | 1.35  | 1.42 | <0.001 |
| <b>N (beneficiary-years)</b>       | 2,654,339 |       |       |        | 262,430 |       |      |        |

**Notes.** Authors' analysis of claims data for 2012–17 from the IBM MarketScan Multi-State Medicaid Database. MH telemedicine visits had a primary diagnosis of mental disorder. Model 7 is a logistic regression model. Model 8 is a generalized linear model with gamma distribution and log link. Both models include clustered standard errors to account for multiple beneficiary-years per unique beneficiary. State fixed effects not shown to protect data contributor confidentiality.

**Table S7. Regression models used to produce results for Exhibit 4 panels 1B and 2B**

|                                                                                    | Model 9.<br>Received any telemedicine for<br>substance use disorder |                            |       |         | Model 10.<br>No. of telemedicine visits for substance<br>use disorder if any received |                            |       |         |
|------------------------------------------------------------------------------------|---------------------------------------------------------------------|----------------------------|-------|---------|---------------------------------------------------------------------------------------|----------------------------|-------|---------|
|                                                                                    | Odds<br>Ratio                                                       | 95% Confidence<br>Interval |       | P value | Coef.                                                                                 | 95% Confidence<br>Interval |       | P value |
| <b>Rurality (ref. = nonrural)</b>                                                  |                                                                     |                            |       |         |                                                                                       |                            |       |         |
| Rural                                                                              | 0.47                                                                | 0.34                       | 0.59  | <0.001  | 0.10                                                                                  | -0.03                      | 0.22  | 0.128   |
| <b>SUD diagnoses (ref. = AUD)</b>                                                  |                                                                     |                            |       |         |                                                                                       |                            |       |         |
| ODD                                                                                | -0.24                                                               | -0.33                      | -0.15 | <0.001  | 0.20                                                                                  | 0.10                       | 0.30  | <0.001  |
| Other                                                                              | 0.21                                                                | 0.13                       | 0.30  | <0.001  | 0.14                                                                                  | 0.05                       | 0.23  | 0.003   |
| Multiple                                                                           | 0.57                                                                | 0.48                       | 0.65  | <0.001  | 0.07                                                                                  | -0.02                      | 0.16  | 0.105   |
| <b>Race/ethnicity (ref. = white)</b>                                               |                                                                     |                            |       |         |                                                                                       |                            |       |         |
| Black                                                                              | 0.06                                                                | -0.01                      | 0.12  | 0.103   | -0.12                                                                                 | -0.19                      | -0.05 | 0.001   |
| Hispanic                                                                           | -0.30                                                               | -0.59                      | 0.00  | 0.049   | -0.17                                                                                 | -0.44                      | 0.11  | 0.237   |
| Other                                                                              | 0.11                                                                | -0.13                      | 0.35  | 0.374   | -0.11                                                                                 | -0.35                      | 0.14  | 0.4     |
| <b>SUD Diagnosis * rurality interaction<br/>(ref. = AUD &amp; nonrural)</b>        |                                                                     |                            |       |         |                                                                                       |                            |       |         |
| ODD & rural                                                                        | 0.11                                                                | -0.05                      | 0.27  | 0.185   | 0.35                                                                                  | 0.18                       | 0.52  | <0.001  |
| Other & rural                                                                      | -0.09                                                               | -0.24                      | 0.06  | 0.221   | -0.09                                                                                 | -0.23                      | 0.05  | 0.209   |
| Multiple & rural                                                                   | -0.03                                                               | -0.18                      | 0.11  | 0.671   | 0.13                                                                                  | -0.02                      | 0.28  | 0.096   |
| <b>Race/ethnicity &amp; rurality interaction<br/>(ref. = white &amp; nonrural)</b> |                                                                     |                            |       |         |                                                                                       |                            |       |         |
| Black & rural                                                                      | -0.31                                                               | -0.46                      | -0.16 | <0.001  | -0.11                                                                                 | -0.26                      | 0.03  | 0.119   |
| Hispanic & rural                                                                   | 0.52                                                                | 0.02                       | 1.02  | 0.04    | 0.01                                                                                  | -0.43                      | 0.46  | 0.95    |
| Other & rural                                                                      | -0.52                                                               | -0.89                      | -0.14 | 0.007   | 0.78                                                                                  | 0.42                       | 1.15  | <0.001  |
| <b>Age group (years; ref. = 35-49)</b>                                             |                                                                     |                            |       |         |                                                                                       |                            |       |         |
| 18-24                                                                              | 0.00                                                                | -0.08                      | 0.07  | 0.908   | -0.01                                                                                 | -0.09                      | 0.08  | 0.875   |
| 25-34                                                                              | 0.01                                                                | -0.05                      | 0.07  | 0.738   | 0.01                                                                                  | -0.05                      | 0.08  | 0.683   |
| 50-64                                                                              | 0.00                                                                | -0.07                      | 0.07  | 0.997   | 0.09                                                                                  | 0.02                       | 0.17  | 0.017   |
| <b>Sex (ref. = female)</b>                                                         |                                                                     |                            |       |         |                                                                                       |                            |       |         |
| Male                                                                               | -0.05                                                               | -0.10                      | 0.01  | 0.093   | -0.07                                                                                 | -0.13                      | -0.02 | 0.011   |
| <b>Health plan type (ref. = managed care)</b>                                      |                                                                     |                            |       |         |                                                                                       |                            |       |         |
| Fee for service                                                                    | -0.10                                                               | -0.18                      | -0.02 | 0.012   | 0.09                                                                                  | 0.02                       | 0.15  | 0.006   |
| <b>Mental disorder diagnoses (ref. = depression)</b>                               |                                                                     |                            |       |         |                                                                                       |                            |       |         |
| None                                                                               | -0.77                                                               | -0.84                      | -0.69 | <0.001  | 0.02                                                                                  | -0.07                      | 0.11  | 0.639   |
| ADHD                                                                               | -0.44                                                               | -0.73                      | -0.16 | 0.002   | 0.26                                                                                  | -0.03                      | 0.56  | 0.082   |
| Anxiety                                                                            | -0.55                                                               | -0.66                      | -0.44 | <0.001  | -0.09                                                                                 | -0.21                      | 0.04  | 0.165   |
| Bipolar                                                                            | 0.30                                                                | 0.20                       | 0.41  | <0.001  | 0.07                                                                                  | -0.04                      | 0.18  | 0.22    |
| PTSD                                                                               | 0.06                                                                | -0.13                      | 0.25  | 0.535   | -0.02                                                                                 | -0.23                      | 0.19  | 0.835   |
| Schizophrenia                                                                      | 0.66                                                                | 0.54                       | 0.78  | <0.001  | -0.01                                                                                 | -0.13                      | 0.11  | 0.9     |
| Other                                                                              | -0.46                                                               | -0.69                      | -0.23 | <0.001  | -0.10                                                                                 | -0.32                      | 0.12  | 0.366   |
| Multiple                                                                           | 0.37                                                                | 0.29                       | 0.44  | <0.001  | -0.09                                                                                 | -0.18                      | -0.01 | 0.024   |

|                                    |         |       |       |        |       |       |       |        |
|------------------------------------|---------|-------|-------|--------|-------|-------|-------|--------|
| <b>Beneficiary-year (ref. = 1)</b> |         |       |       |        |       |       |       |        |
| 2                                  | 0.17    | 0.11  | 0.22  | <0.001 | 0.14  | 0.08  | 0.20  | <0.001 |
| 3                                  | 0.16    | 0.08  | 0.23  | <0.001 | 0.13  | 0.06  | 0.20  | 0.001  |
| 4                                  | 0.10    | 0.01  | 0.19  | 0.027  | 0.22  | 0.12  | 0.31  | <0.001 |
| 5                                  | 0.12    | 0.02  | 0.23  | 0.021  | 0.11  | -0.01 | 0.22  | 0.065  |
| 6                                  | 0.07    | -0.07 | 0.21  | 0.3    | 0.29  | 0.12  | 0.47  | 0.001  |
| <b>Study year (ref. = 2012)</b>    |         |       |       |        |       |       |       |        |
| 2013                               | -0.08   | -0.16 | 0.01  | 0.067  | -0.16 | -0.25 | -0.07 | 0.001  |
| 2014                               | -0.58   | -0.68 | -0.48 | <0.001 | -0.10 | -0.21 | 0.01  | 0.081  |
| 2015                               | -0.15   | -0.24 | -0.06 | 0.001  | -0.38 | -0.48 | -0.28 | <0.001 |
| 2016                               | 0.46    | 0.38  | 0.54  | <0.001 | -0.27 | -0.36 | -0.18 | <0.001 |
| 2017                               | 0.52    | 0.44  | 0.61  | <0.001 | -0.46 | -0.56 | -0.37 | <0.001 |
| <b>Constant</b>                    | -4.90   | -5.02 | -4.77 | <0.001 | 1.20  | 1.08  | 1.33  | <0.001 |
| <b>N (beneficiary-years)</b>       | 663,068 |       |       |        | 8,943 |       |       |        |

**Notes.** Authors' analysis of claims data for 2012–17 from the IBM MarketScan Multi-State Medicaid Database. SUD telemedicine visits had a primary diagnosis of SUD. Model 9 is a logistic regression model. Model 10 is a generalized linear model with gamma distribution and log link. Both models include clustered standard errors to account for multiple beneficiary-years per unique beneficiary. State fixed effects not shown to protect data contributor confidentiality.
